# Supplementary figures and images for: A novel poly(acrylonitrile)/poly(ethylene glycol)-based polymer gel electrolyte for high efficiency dye sensitized solar cells
Source: Royal Society of Chemistry journal article supplement (doi:10.1039/d3ya00079f), 2023-01-01

## Supplementary material

Figure S1: XRD pattern of (a) PAN/LiI/KI and (b) PAN-PEG/LiI/KI blend PGEs.

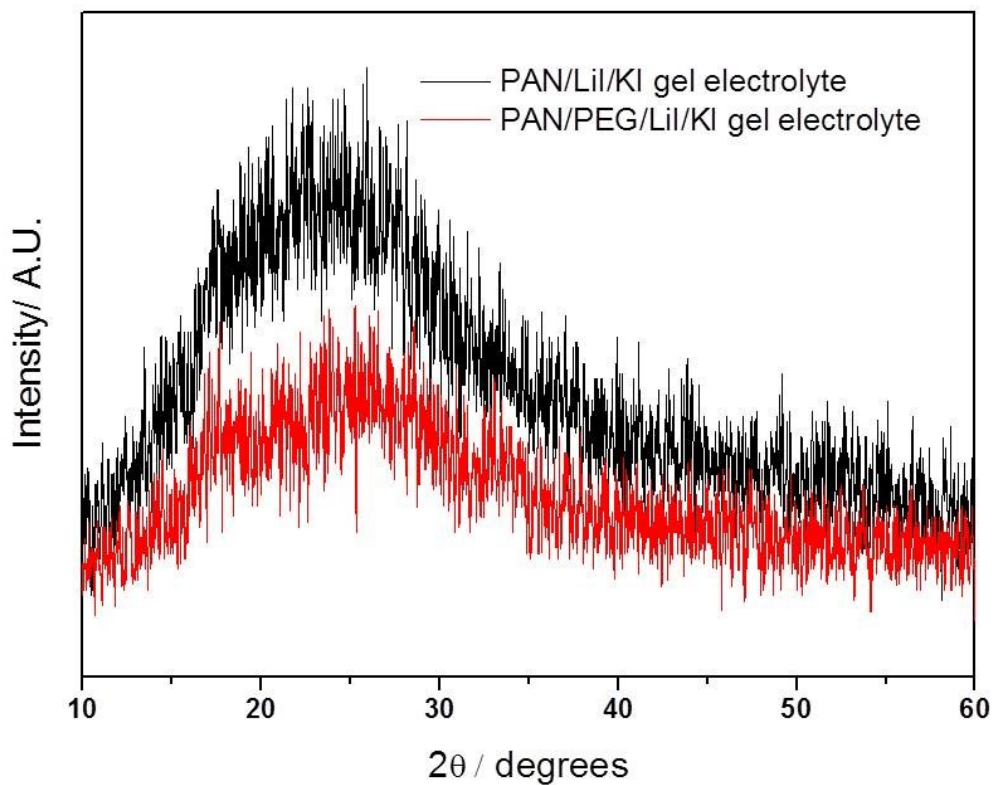

Supplement: d3ya00079f1.pdf [file d3ya00079f1.pdf]
